# Supplementary material for: Octahedral lanthanide clusters containing a central PO43− anion: structural, luminescent, magnetic and relaxometric properties
Source: Royal Society of Chemistry journal article supplement (doi:10.1039/d3dt01542d), 2023-01-01
Supplement: d3dt01542d1.pdf [file d3dt01542d1.pdf]

## Supplementary Information

### **Octahedral lanthanide clusters containing a central $\text{PO}_4^{3-}$ anion: structures, luminescent, magnetic and relaxometric properties**

Yi-Ping Qu, Xin-Da Huang, Kui Xu, Song-Song Bao, and Li-Min Zheng\*

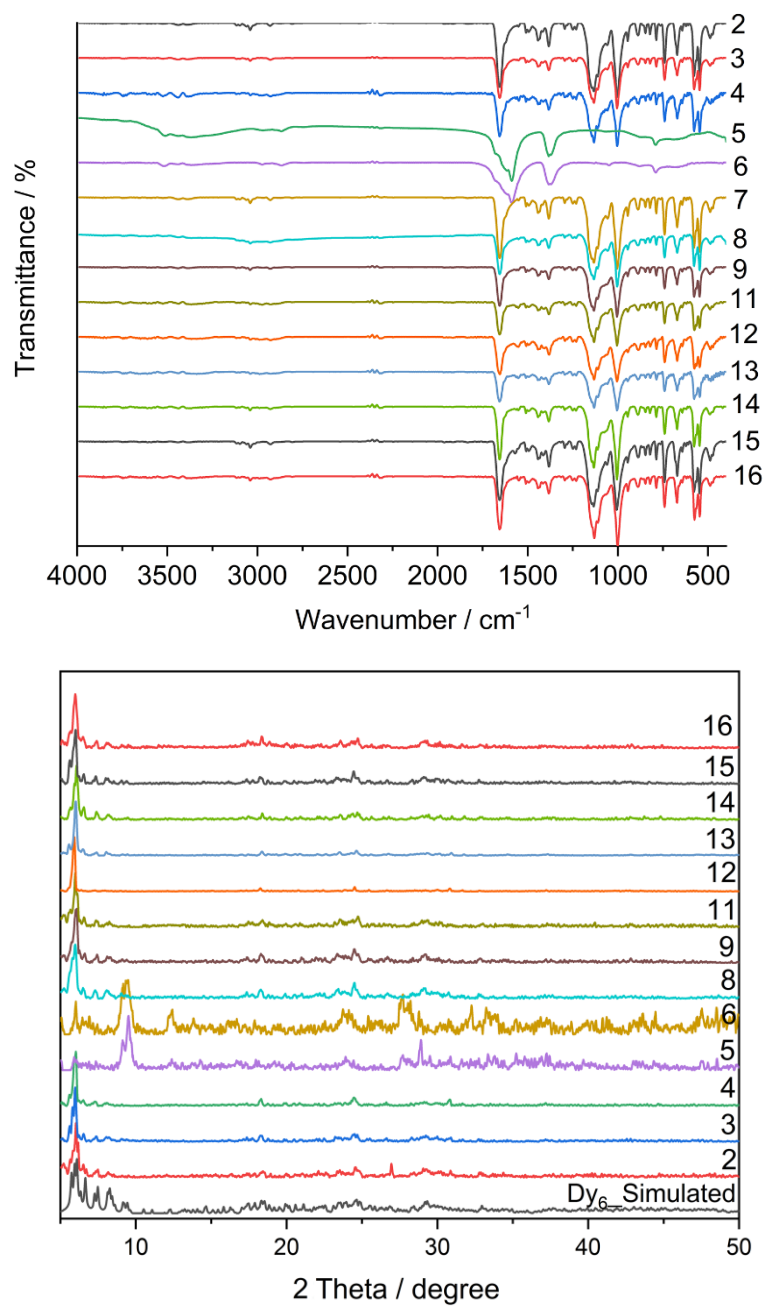

**Fig. S1** IR spectra and PXRD patterns of solid products obtained under different experimental conditions given in Table S1.

**Table S1** Products and productivities (based on Dy(NO<sub>3</sub>)<sub>3</sub>·6H<sub>2</sub>O) under different conditions.

| Condition | Dy(NO <sub>3</sub> ) <sub>3</sub><br>·6H <sub>2</sub> O<br>(mmol) | AnPO <sub>3</sub> H <sub>2</sub><br>(mmol) | DMF/H <sub>2</sub> O<br>(mL/mL) | Time<br>(h) | Temperature (°C) | Na <sub>3</sub> PO <sub>4</sub><br>(mmol) | Product         | Yield (mg, %) |
|-----------|-------------------------------------------------------------------|--------------------------------------------|---------------------------------|-------------|------------------|-------------------------------------------|-----------------|---------------|
| 1         | 0.1                                                               | 0.2                                        | 3/0                             | 24          | 120              | /                                         | /               | /             |
| 2         | 0.1                                                               | 0.2                                        | 3/0.5                           | 24          | 120              | /                                         | Dy <sub>6</sub> | 49.3, 79.1    |
| 3         | 0.1                                                               | 0.2                                        | 3/1                             | 24          | 120              | /                                         | Dy <sub>6</sub> | 50.2, 80.5    |
| 4         | 0.1                                                               | 0.2                                        | 3/1.5                           | 24          | 120              | /                                         | Dy <sub>6</sub> | 45.4, 72.8    |
| 5         | 0.3                                                               | 0.1                                        | 3/1                             | 24          | 120              | /                                         | White Powder    | /             |
| 6         | 0.2                                                               | 0.1                                        | 3/1                             | 24          | 120              | /                                         | White Powder    | /             |
| 7         | 0.1                                                               | 0.1                                        | 3/1                             | 24          | 120              | /                                         | Dy <sub>6</sub> | <1, <1.6%     |
| 8         | 0.1                                                               | 0.3                                        | 3/1                             | 24          | 120              | /                                         | Dy <sub>6</sub> | 45.6, 73.1    |
| 9         | 0.1                                                               | 0.2                                        | 3/1                             | 48          | 120              | /                                         | Dy <sub>6</sub> | 48.9, 78.4    |
| 10        | 0.1                                                               | 0.2                                        | 3/1                             | 6           | 120              | /                                         | /               | /             |
| 11        | 0.1                                                               | 0.2                                        | 3/1                             | 12          | 120              | /                                         | Dy <sub>6</sub> | 32.5, 52.1    |
| 12        | 0.1                                                               | 0.2                                        | 3/1                             | 24          | 100              | /                                         | Dy <sub>6</sub> | 12, 19.2      |
| 13        | 0.1                                                               | 0.2                                        | 3/1                             | 24          | 110              | /                                         | Dy <sub>6</sub> | 30.9, 49.5    |
| 14        | 0.1                                                               | 0.2                                        | 3/1                             | 24          | 130              | /                                         | Dy <sub>6</sub> | 47.3, 75.9    |
| 15        | 0.1                                                               | 0.2                                        | 3/1                             | 24          | 140              | /                                         | Dy <sub>6</sub> | 48.1, 77.1    |
| 16        | 0.1                                                               | 0.2                                        | 3/1                             | 24          | 120              | 0.013                                     | Dy <sub>6</sub> | 53.7, 86.1    |
| 17        | 0.1                                                               | 0.2                                        | 4/0                             | 24          | 120              | 0.013                                     | /               | /             |

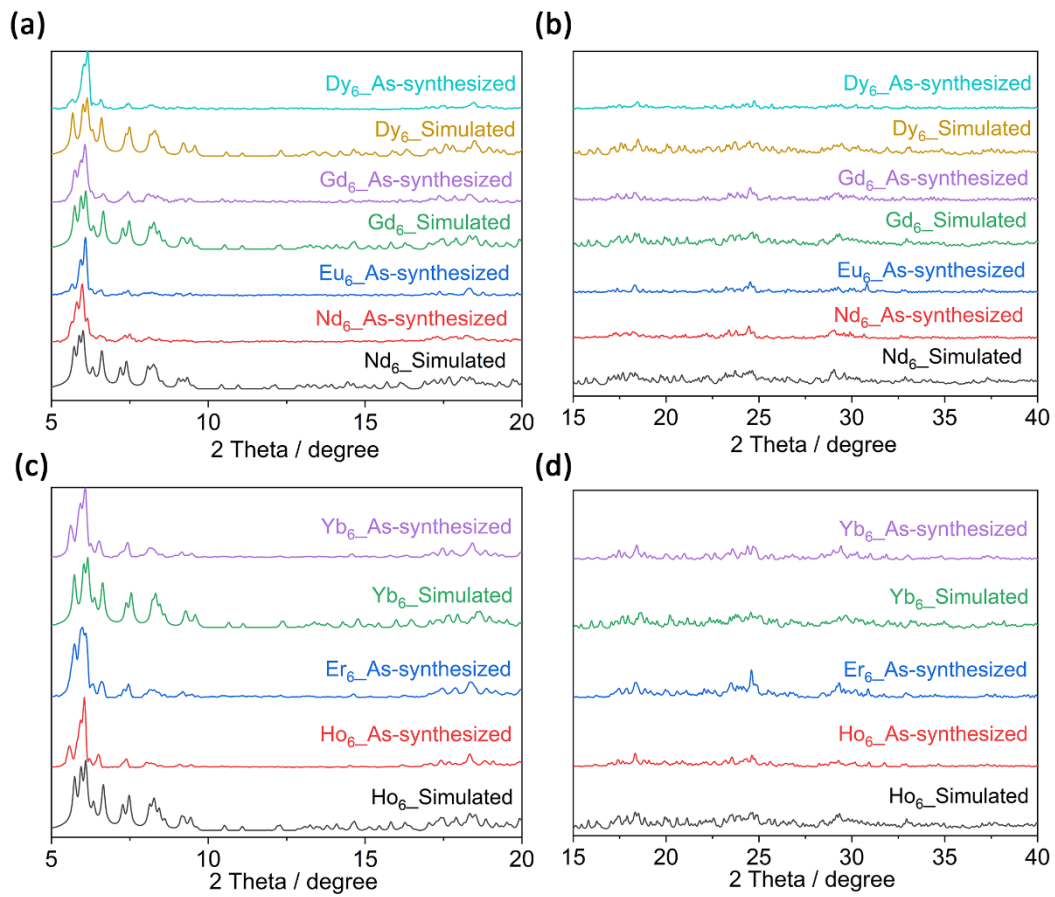

**Fig. S2** Simulated and experimental PXRD patterns of  $\text{Ln}_6$ .

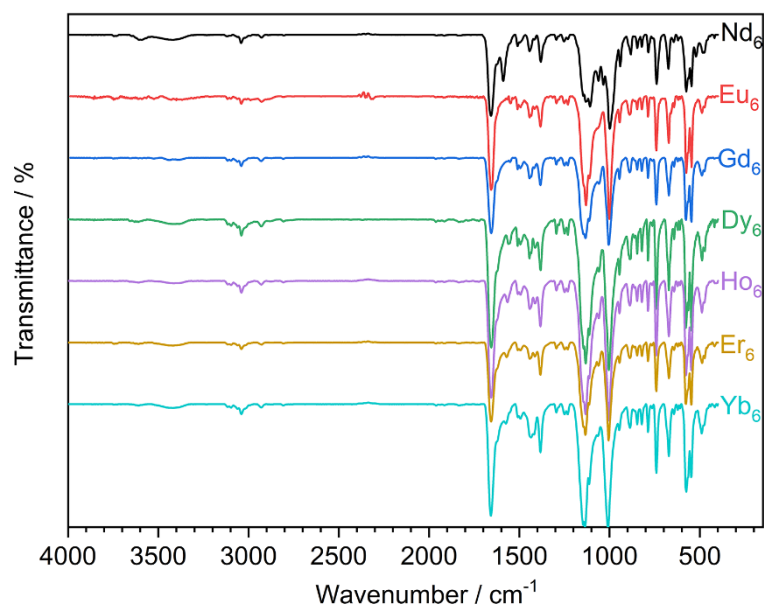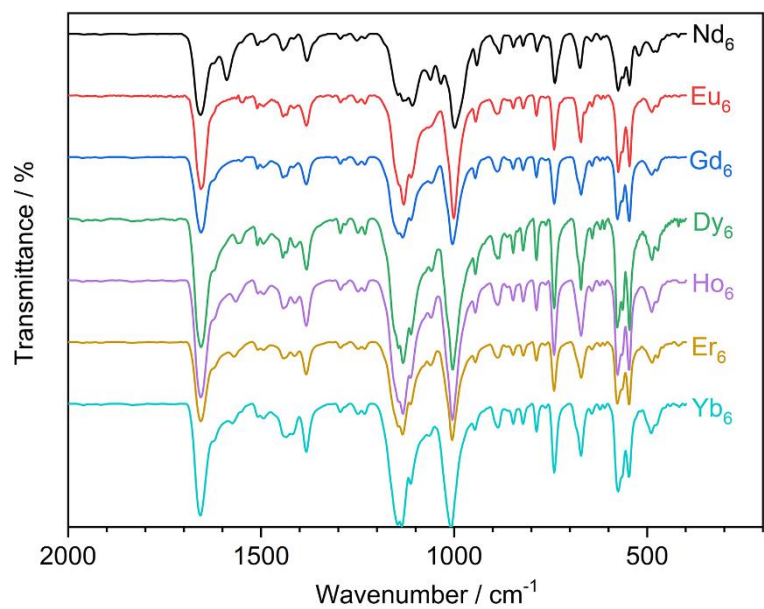

**Fig. S3** The IR spectra of Ln<sub>6</sub> in the range of 400 – 4000 cm<sup>-1</sup> and 400 – 2000 cm<sup>-1</sup>.

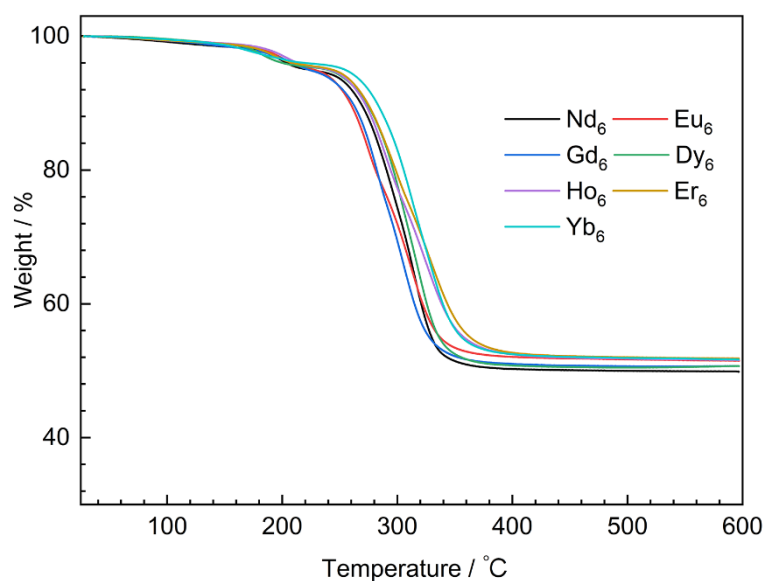

**Fig. S4** TG curves of  $\text{Ln}_6$  at 30-600°C with a heating rate of 5°C/min.

**Table S2** Calculated and experimental weight loss of  $\text{Ln}_6$ .

|                                                 | $\text{Nd}_6$ | $\text{Eu}_6$ | $\text{Gd}_6$ | $\text{Dy}_6$ | $\text{Ho}_6$ | $\text{Er}_6$ | $\text{Yb}_6$ |
|-------------------------------------------------|---------------|---------------|---------------|---------------|---------------|---------------|---------------|
| Temperature range/°C                            | 30-130        | 30-132        | 30-134        | 30-136        | 30-136        | 30-137        | 30-137        |
| Calculated weight loss (-2H <sub>2</sub> O)/%   | 1.0           | 1.0           | 1.0           | 1.0           | 1.0           | 1.0           | 0.9           |
| Experimental weight loss (-2H <sub>2</sub> O)/% | 1.3           | 1.0           | 1.0           | 0.9           | 1.2           | 1.0           | 1.0           |
| Temperature range/°C                            | 130-220       | 132-221       | 134-220       | 136-209       | 136-215       | 137-221       | 137-226       |
| Calculated weight loss (-2DMF)/%                | 4.0           | 4.0           | 4.0           | 3.9           | 3.9           | 3.9           | 3.8           |
| Experimental weight loss (-2DMF)/%              | 3.7           | 4.0           | 4.0           | 3.8           | 3.9           | 3.2           | 3.2           |

**Table S3** Selected bond lengths (Å) and angles (°) for **Nd<sub>6</sub>** at 193 K.

|            |            |             |            |             |            |
|------------|------------|-------------|------------|-------------|------------|
| Nd1-O1     | 2.327(4)   | O1-Nd1-O28  | 113.89(14) | O17-Nd4-O20 | 170.94(18) |
| Nd1-O4     | 2.348(5)   | O4-Nd1-O28  | 115.10(15) | O14-Nd4-O20 | 88.35(16)  |
| Nd1-O22    | 2.372(4)   | O22-Nd1-O28 | 74.38(14)  | O17-Nd4-O23 | 91.40(19)  |
| Nd1-O19    | 2.393(5)   | O19-Nd1-O28 | 79.19(15)  | O14-Nd4-O23 | 177.18(16) |
| Nd1-O29    | 2.465(5)   | O29-Nd1-O28 | 143.81(17) | O20-Nd4-O23 | 91.87(18)  |
| Nd1-O28    | 2.532(4)   | O1-Nd1-O25  | 74.77(14)  | O17-Nd4-O32 | 94.7(4)    |
| Nd1-O25    | 2.579(4)   | O4-Nd1-O25  | 77.10(15)  | O14-Nd4-O32 | 96.8(3)    |
| Nd2-O7     | 2.307(5)   | O22-Nd1-O25 | 112.36(15) | O20-Nd4-O32 | 94.0(3)    |
| Nd2-O2     | 2.336(4)   | O19-Nd1-O25 | 119.81(15) | O23-Nd4-O32 | 86.0(3)    |
| Nd2-O10    | 2.351(5)   | O29-Nd1-O25 | 157.66(16) | O17-Nd4-O28 | 92.49(16)  |
| Nd2-O5     | 2.362(4)   | O28-Nd1-O25 | 57.05(13)  | O14-Nd4-O28 | 99.48(14)  |
| Nd2-O30    | 2.394(8)   | O7-Nd2-O2   | 93.33(18)  | O20-Nd4-O28 | 79.96(15)  |
| Nd2-O25    | 2.444(4)   | O7-Nd2-O10  | 85.50(18)  | O23-Nd4-O28 | 77.80(15)  |
| Nd3-O13    | 2.321(4)   | O2-Nd2-O10  | 175.52(16) | O32-Nd4-O28 | 162.4(3)   |
| Nd3-O11    | 2.338(4)   | O7-Nd2-O5   | 163.89(18) | O15-Nd5-O21 | 91.39(18)  |
| Nd3-O8     | 2.358(5)   | O2-Nd2-O5   | 94.60(17)  | O15-Nd5-O3  | 171.87(15) |
| Nd3-O16    | 2.402(5)   | O10-Nd2-O5  | 85.51(17)  | O21-Nd5-O3  | 84.78(17)  |
| Nd3-O31    | 2.477(5)   | O7-Nd2-O30  | 76.7(4)    | O15-Nd5-O9  | 93.75(18)  |
| Nd3-O27    | 2.537(4)   | O2-Nd2-O30  | 92.4(4)    | O21-Nd5-O9  | 160.50(16) |
| Nd3-O26    | 2.582(4)   | O10-Nd2-O30 | 91.5(4)    | O3-Nd5-O9   | 87.62(17)  |
| Nd4-O17    | 2.293(5)   | O5-Nd2-O30  | 116.9(4)   | O15-Nd5-O33 | 92.15(18)  |
| Nd4-O14    | 2.312(4)   | O7-Nd2-O25  | 90.28(16)  | O21-Nd5-O33 | 81.5(2)    |
| Nd4-O20    | 2.341(5)   | O2-Nd2-O25  | 77.57(15)  | O3-Nd5-O33  | 94.36(18)  |
| Nd4-O23    | 2.369(5)   | O10-Nd2-O25 | 98.09(14)  | O9-Nd5-O33  | 117.08(19) |
| Nd4-O32    | 2.383(7)   | O5-Nd2-O25  | 77.80(15)  | O15-Nd5-O26 | 76.16(14)  |
| Nd4-O28    | 2.414(4)   | O30-Nd2-O25 | 163.2(3)   | O21-Nd5-O26 | 85.60(15)  |
| Nd5-O15    | 2.319(5)   | O13-Nd3-O11 | 171.17(16) | O3-Nd5-O26  | 96.36(14)  |
| Nd5-O21    | 2.326(5)   | O13-Nd3-O8  | 90.44(17)  | O9-Nd5-O26  | 77.42(15)  |
| Nd5-O3     | 2.333(4)   | O11-Nd3-O8  | 85.34(17)  | O33-Nd5-O26 | 162.35(17) |
| Nd5-O9     | 2.362(5)   | O13-Nd3-O16 | 90.82(18)  | O6-Nd6-O24  | 88.16(17)  |
| Nd5-O33    | 2.415(5)   | O11-Nd3-O16 | 90.95(18)  | O6-Nd6-O12  | 92.17(18)  |
| Nd5-O26    | 2.481(4)   | O8-Nd3-O16  | 162.81(18) | O24-Nd6-O12 | 178.62(15) |
| Nd6-O6     | 2.301(5)   | O13-Nd3-O31 | 93.32(16)  | O6-Nd6-O18  | 174.42(16) |
| Nd6-O24    | 2.342(4)   | O11-Nd3-O31 | 78.52(16)  | O24-Nd6-O18 | 87.02(16)  |
| Nd6-O12    | 2.353(4)   | O8-Nd3-O31  | 83.53(18)  | O12-Nd6-O18 | 92.57(17)  |
| Nd6-O18    | 2.357(4)   | O16-Nd3-O31 | 79.28(17)  | O6-Nd6-O34  | 92.08(17)  |
| Nd6-O34    | 2.374(4)   | O13-Nd3-O27 | 114.29(15) | O24-Nd6-O34 | 96.18(17)  |
| Nd6-O27    | 2.415(4)   | O11-Nd3-O27 | 74.53(14)  | O12-Nd6-O34 | 85.15(16)  |
| O1-Nd1-O4  | 91.89(18)  | O8-Nd3-O27  | 117.85(15) | O18-Nd6-O34 | 91.25(16)  |
| O1-Nd1-O22 | 171.58(16) | O16-Nd3-O27 | 76.99(14)  | O6-Nd6-O27  | 95.83(15)  |
| O4-Nd1-O22 | 85.60(18)  | O31-Nd3-O27 | 143.46(15) | O24-Nd6-O27 | 101.60(15) |
| O1-Nd1-O19 | 90.44(17)  | O13-Nd3-O26 | 75.15(14)  | O12-Nd6-O27 | 77.03(13)  |
| O4-Nd1-O19 | 162.88(17) | O11-Nd3-O26 | 111.53(14) | O18-Nd6-O27 | 82.39(14)  |

|             |           |             |            |             |            |
|-------------|-----------|-------------|------------|-------------|------------|
| O22-Nd1-O19 | 89.65(17) | O8-Nd3-O26  | 79.20(16)  | O34-Nd6-O27 | 160.73(16) |
| O1-Nd1-O29  | 95.06(17) | O16-Nd3-O26 | 117.64(16) | Nd1-O28-Nd4 | 136.36(15) |
| O4-Nd1-O29  | 83.53(18) | O31-Nd3-O26 | 159.05(15) | Nd1-O25-Nd2 | 135.84(13) |
| O22-Nd1-O29 | 76.68(17) | O27-Nd3-O26 | 56.93(12)  | Nd6-O26-Nd5 | 135.50(16) |
| O19-Nd1-O29 | 79.36(18) | O17-Nd4-O14 | 87.98(17)  | Nd6-O27-Nd3 | 136.28(15) |

**Table S4** Selected bond lengths (Å) and angles (°) for **Gd<sub>6</sub>** at 193 K

|         |          |             |            |             |            |
|---------|----------|-------------|------------|-------------|------------|
| Gd1-O1  | 2.278(5) | O1-Gd1-O28  | 114.12(16) | O17-Gd4-O20 | 171.6(2)   |
| Gd1-O4  | 2.291(5) | O4-Gd1-O28  | 116.30(17) | O14-Gd4-O20 | 87.88(19)  |
| Gd1-O22 | 2.300(5) | O22-Gd1-O28 | 74.43(17)  | O17-Gd4-O23 | 90.5(2)    |
| Gd1-O19 | 2.343(5) | O19-Gd1-O28 | 78.35(17)  | O14-Gd4-O23 | 177.4(2)   |
| Gd1-O29 | 2.372(5) | O29-Gd1-O28 | 144.14(19) | O20-Gd4-O23 | 93.3(2)    |
| Gd1-O28 | 2.471(4) | O1-Gd1-O25  | 75.49(16)  | O17-Gd4-O32 | 96.1(5)    |
| Gd1-O25 | 2.512(5) | O4-Gd1-O25  | 76.75(18)  | O14-Gd4-O32 | 99.7(5)    |
| Gd2-O7  | 2.248(5) | O22-Gd1-O25 | 111.81(17) | O20-Gd4-O32 | 91.8(5)    |
| Gd2-O2  | 2.259(5) | O19-Gd1-O25 | 119.92(17) | O23-Gd4-O32 | 82.6(5)    |
| Gd2-O5  | 2.288(5) | O29-Gd1-O25 | 156.85(18) | O17-Gd4-O28 | 93.00(18)  |
| Gd2-O10 | 2.292(5) | O28-Gd1-O25 | 58.10(14)  | O14-Gd4-O28 | 99.86(16)  |
| Gd2-O30 | 2.337(8) | O7-Gd2-O2   | 92.5(2)    | O20-Gd4-O28 | 80.50(16)  |
| Gd2-O25 | 2.392(4) | O7-Gd2-O5   | 166.11(18) | O23-Gd4-O28 | 78.05(17)  |
| Gd3-O13 | 2.274(5) | O2-Gd2-O5   | 94.28(19)  | O32-Gd4-O28 | 158.7(5)   |
| Gd3-O11 | 2.280(5) | O7-Gd2-O10  | 86.59(19)  | O21-Gd5-O15 | 91.62(19)  |
| Gd3-O8  | 2.298(5) | O2-Gd2-O10  | 176.86(17) | O21-Gd5-O3  | 86.02(18)  |
| Gd3-O16 | 2.330(5) | O5-Gd2-O10  | 86.01(19)  | O15-Gd5-O3  | 174.47(17) |
| Gd3-O31 | 2.389(5) | O7-Gd2-O30  | 79.1(4)    | O21-Gd5-O9  | 164.70(18) |
| Gd3-O27 | 2.488(4) | O2-Gd2-O30  | 90.5(4)    | O15-Gd5-O9  | 93.15(19)  |
| Gd3-O26 | 2.508(5) | O5-Gd2-O30  | 112.9(4)   | O3-Gd5-O9   | 87.90(18)  |
| Gd4-O17 | 2.235(5) | O10-Gd2-O30 | 92.3(4)    | O21-Gd5-O33 | 84.7(2)    |
| Gd4-O14 | 2.257(5) | O7-Gd2-O25  | 90.57(17)  | O15-Gd5-O33 | 90.0(2)    |
| Gd4-O20 | 2.279(5) | O2-Gd2-O25  | 78.70(16)  | O3-Gd5-O33  | 94.71(19)  |
| Gd4-O23 | 2.288(5) | O5-Gd2-O25  | 78.90(17)  | O9-Gd5-O33  | 109.8(2)   |
| Gd4-O32 | 2.327(8) | O10-Gd2-O25 | 98.30(16)  | O21-Gd5-O26 | 88.69(17)  |
| Gd4-O28 | 2.367(4) | O30-Gd2-O25 | 164.8(4)   | O15-Gd5-O26 | 77.08(16)  |
| Gd5-O21 | 2.249(5) | O13-Gd3-O11 | 170.37(18) | O3-Gd5-O26  | 97.84(15)  |
| Gd5-O15 | 2.251(5) | O13-Gd3-O8  | 91.09(19)  | O9-Gd5-O26  | 78.25(17)  |
| Gd5-O3  | 2.278(4) | O11-Gd3-O8  | 84.80(19)  | O33-Gd5-O26 | 165.39(18) |
| Gd5-O9  | 2.283(5) | O13-Gd3-O16 | 90.19(19)  | O6-Gd6-O24  | 88.7(2)    |
| Gd5-O33 | 2.330(6) | O11-Gd3-O16 | 91.26(19)  | O6-Gd6-O12  | 90.9(2)    |
| Gd5-O26 | 2.397(4) | O8-Gd3-O16  | 163.15(19) | O24-Gd6-O12 | 178.05(18) |
| Gd6-O6  | 2.262(5) | O13-Gd3-O31 | 91.46(18)  | O6-Gd6-O18  | 173.8(2)   |
| Gd6-O24 | 2.265(5) | O11-Gd3-O31 | 79.48(18)  | O24-Gd6-O18 | 86.38(19)  |
| Gd6-O12 | 2.289(5) | O8-Gd3-O31  | 84.15(19)  | O12-Gd6-O18 | 93.93(18)  |
| Gd6-O18 | 2.291(4) | O16-Gd3-O31 | 79.02(19)  | O6-Gd6-O34  | 92.58(19)  |



|             |            |             |            |             |            |
|-------------|------------|-------------|------------|-------------|------------|
| Gd6-O34     | 2.293(5)   | O13-Gd3-O27 | 114.86(17) | O24-Gd6-O34 | 96.4(2)    |
| Gd6-O27     | 2.355(4)   | O11-Gd3-O27 | 74.71(17)  | O12-Gd6-O34 | 85.50(19)  |
| O1-Gd1-O4   | 92.1(2)    | O8-Gd3-O27  | 117.81(16) | O18-Gd6-O34 | 91.66(18)  |
| O1-Gd1-O22  | 171.27(18) | O16-Gd3-O27 | 76.57(16)  | O6-Gd6-O27  | 95.48(17)  |
| O4-Gd1-O22  | 85.2(2)    | O31-Gd3-O27 | 143.75(17) | O24-Gd6-O27 | 100.05(18) |
| O1-Gd1-O19  | 89.16(19)  | O13-Gd3-O26 | 75.73(16)  | O12-Gd6-O27 | 78.10(17)  |
| O4-Gd1-O19  | 163.0(2)   | O11-Gd3-O26 | 111.74(16) | O18-Gd6-O27 | 81.74(15)  |
| O22-Gd1-O19 | 91.0(2)    | O8-Gd3-O26  | 77.93(17)  | O34-Gd6-O27 | 161.80(19) |
| O1-Gd1-O29  | 93.07(19)  | O16-Gd3-O26 | 118.60(17) | Gd1-O25-Gd2 | 136.26(20) |
| O4-Gd1-O29  | 83.8(2)    | O31-Gd3-O26 | 157.62(17) | Gd1-O28-Gd4 | 137.19(20) |
| O22-Gd1-O29 | 78.4(2)    | O27-Gd3-O26 | 58.27(14)  | Gd3-O26-Gd5 | 136.76(20) |
| O19-Gd1-O29 | 79.2(2)    | O17-Gd4-O14 | 88.0(2)    | Gd3-O27-Gd6 | 136.80(21) |

**Table S5** Selected bond lengths (Å) and angles (°) for **Dy<sub>6</sub>** at 193 K

|         |           |               |           |             |          |
|---------|-----------|---------------|-----------|-------------|----------|
| Dy1-O25 | 2.520(9)  | O9-Dy1-O25    | 73.0(3)   | O24-Dy4-O34 | 112.9(4) |
| Dy1-O31 | 2.335(9)  | O13-Dy1-O25   | 110.5(3)  | O15-Dy4-O34 | 92.1(3)  |
| Dy1-O11 | 2.291(6)  | O(23)-Dy1-O25 | 112.6(3)  | O21-Dy4-O34 | 96.1(3)  |
| Dy1-O23 | 2.261(7)  | O11-Dy1-O25   | 79.2(3)   | O18-Dy4-O26 | 86.3(3)  |
| Dy1-O13 | 2.233(6)  | O31-Dy1-O25   | 146.9(3)  | O24-Dy4-O26 | 73.7(3)  |
| Dy1-O9  | 2.224(6)  | O9-Dy1-O26    | 108.7(3)  | O15-Dy4-O26 | 75.9(3)  |
| Dy1-O26 | 2.595(10) | O13-Dy1-O26   | 73.2(3)   | O21-Dy4-O26 | 95.9(3)  |
| Dy2-O25 | 2.548(10) | O23-Dy1-O26   | 75.2(3)   | O34-Dy4-O26 | 166.6(4) |
| Dy2-O7  | 2.231(6)  | O11-Dy1-O26   | 116.8(3)  | O12-Dy5-O1  | 92.1(3)  |
| Dy2-O2  | 2.223(6)  | O31-Dy1-O26   | 158.2(3)  | O12-Dy5-O14 | 87.5(3)  |
| Dy2-O10 | 2.205(6)  | O25-Dy1-O26   | 53.9(3)   | O1-Dy5-O14  | 177.1(2) |
| Dy2-O29 | 2.161(19) | O29-Dy2-O6    | 89.3(7)   | O12-Dy5-O17 | 172.7(2) |
| Dy2-O6  | 2.186(7)  | O29-Dy2-O10   | 109.8(7)  | O1-Dy5-O17  | 92.7(2)  |
| Dy3-O22 | 2.212(6)  | O6-Dy2-O10    | 160.9(3)  | O14-Dy5-O17 | 87.5(2)  |
| Dy3-O5  | 2.278(6)  | O29-Dy2-O2    | 98.0(11)  | O12-Dy5-O32 | 85.9(3)  |
| Dy3-O30 | 2.274(7)  | O6-Dy2-O2     | 87.8(2)   | O1-Dy5-O32  | 87.0(2)  |
| Dy3-O20 | 2.252(7)  | O10-Dy2-O2    | 88.0(2)   | O14-Dy5-O32 | 95.8(2)  |
| Dy3-O8  | 2.243(6)  | O29-Dy2-O7    | 89.0(11)  | O17-Dy5-O32 | 100.0(2) |
| Dy3-O27 | 2.324(6)  | O6-Dy2-O7     | 87.8(2)   | O12-Dy5-O28 | 94.2(3)  |
| Dy4-O26 | 2.539(11) | O10-Dy2-O7    | 93.9(2)   | O1-Dy5-O28  | 77.9(2)  |
| Dy4-O34 | 2.262(12) | O2-Dy2-O7     | 171.7(2)  | O14-Dy5-O28 | 99.3(2)  |
| Dy4-O21 | 2.231(6)  | O29-Dy2-O25   | 164.5(11) | O17-Dy5-O28 | 81.3(2)  |
| Dy4-O15 | 2.220(6)  | O6-Dy2-O25    | 87.1(3)   | O32-Dy5-O28 | 164.9(2) |
| Dy4-O24 | 2.211(6)  | O10-Dy2-O25   | 74.9(3)   | O3-Dy6-O19  | 170.5(2) |
| Dy4-O18 | 2.194(7)  | O2-Dy2-O25    | 96.9(2)   | O3-Dy6-O16  | 92.2(2)  |
| Dy5-O32 | 2.318(7)  | O7-Dy2-O25    | 75.9(2)   | O19-Dy6-O16 | 84.7(2)  |
| Dy5-O17 | 2.254(6)  | O22-Dy3-O8    | 89.1(3)   | O3-Dy6-O4   | 89.1(2)  |
| Dy5-O14 | 2.232(6)  | O22-Dy3-O20   | 89.9(3)   | O19-Dy6-O4  | 91.3(3)  |
| Dy5-O1  | 2.220(6)  | O8-Dy3-O20    | 178.1(2)  | O16-Dy6-O4  | 163.6(2) |

|             |          |             |          |             |            |
|-------------|----------|-------------|----------|-------------|------------|
| Dy5-O12     | 2.188(7) | O22-Dy3-O30 | 90.5(2)  | O3-Dy6-O33  | 90.0(2)    |
| Dy5-O28     | 2.337(6) | O8-Dy3-O30  | 95.4(2)  | O19-Dy6-O33 | 80.7(2)    |
| Dy6-O28     | 2.479(7) | O20-Dy3-O30 | 86.3(2)  | O16-Dy6-O33 | 84.9(2)    |
| Dy6-O27     | 2.494(6) | O22-Dy3-O5  | 174.3(3) | O4-Dy6-O33  | 78.7(2)    |
| Dy6-O33     | 2.354(7) | O8-Dy3-O5   | 85.7(2)  | O3-Dy6-O28  | 76.6(2)    |
| Dy6-O4      | 2.299(6) | O20-Dy3-O5  | 95.2(3)  | O19-Dy6-O28 | 111.5(2)   |
| Dy6-O16     | 2.279(6) | O30-Dy3-O5  | 92.4(2)  | O16-Dy6-O28 | 78.4(2)    |
| Dy6-O19     | 2.239(6) | O22-Dy3-O27 | 96.1(2)  | O4-Dy6-O28  | 117.7(2)   |
| Dy6-O3      | 2.228(6) | O8-Dy3-O27  | 100.3(2) | O33-Dy6-O28 | 158.1(2)   |
| O9-Dy1-O13  | 176.3(2) | O20-Dy3-O27 | 78.2(2)  | O3-Dy6-O27  | 114.2(2)   |
| O9-Dy1-O23  | 87.5(3)  | O30-Dy3-O27 | 163.0(2) | O19-Dy6-O27 | 75.1(2)    |
| O13-Dy1-O23 | 90.0(2)  | O5-Dy3-O27  | 82.3(2)  | O16-Dy6-O27 | 116.6(2)   |
| O9-Dy1-O11  | 91.8(3)  | O18-Dy4-O24 | 158.8(3) | O4-Dy6-O27  | 77.5(2)    |
| O13-Dy1-O11 | 90.0(3)  | O18-Dy4-O15 | 91.2(2)  | O33-Dy6-O27 | 145.4(2)   |
| O23-Dy1-O11 | 167.3(2) | O24-Dy4-O15 | 91.0(2)  | O28-Dy6-O27 | 56.4(2)    |
| O9-Dy1-O31  | 81.2(3)  | O18-Dy4-O21 | 87.9(2)  | Dy1-O25-Dy2 | 133.34(37) |
| O13-Dy1-O31 | 96.0(3)  | O24-Dy4-O21 | 86.9(2)  | Dy1-O26-Dy4 | 134.41(41) |
| O23-Dy1-O31 | 86.2(3)  | O15-Dy4-O21 | 171.8(2) | Dy6-O27-Dy3 | 135.55(26) |
| O11-Dy1-O31 | 81.2(3)  | O18-Dy4-O34 | 88.1(4)  | Dy6-O28-Dy5 | 135.96(27) |

**Table S6** Selected bond lengths (Å) and angles (°) for **Ho<sub>6</sub>** at 193 K

|         |           |             |          |             |          |
|---------|-----------|-------------|----------|-------------|----------|
| Ho1-O1  | 2.228(6)  | O1-Ho1-O28  | 111.2(3) | O32-Ho4-O14 | 102(3)   |
| Ho1-O22 | 2.228(6)  | O22-Ho1-O28 | 72.7(3)  | O17-Ho4-O14 | 88.2(2)  |
| Ho1-O4  | 2.253(7)  | O4-Ho1-O28  | 112.4(3) | O32-Ho4-O23 | 86(3)    |
| Ho1-O19 | 2.274(7)  | O19-Ho1-O28 | 79.5(3)  | O17-Ho4-O23 | 87.8(2)  |
| Ho1-O29 | 2.322(8)  | O29-Ho1-O28 | 147.5(3) | O14-Ho4-O23 | 172.2(2) |
| Ho1-O28 | 2.530(9)  | O1-Ho1-O25  | 74.5(3)  | O32-Ho4-O20 | 101(2)   |
| Ho1-O25 | 2.570(9)  | O22-Ho1-O25 | 107.8(3) | O17-Ho4-O20 | 161.1(3) |
| Ho2-O7  | 2.193(7)  | O4-Ho1-O25  | 75.8(3)  | O14-Ho4-O20 | 87.8(2)  |
| Ho2-O5  | 2.215(6)  | O19-Ho1-O25 | 116.5(3) | O23-Ho4-O20 | 93.8(2)  |
| Ho2-O30 | 2.223(13) | O29-Ho1-O25 | 158.2(3) | O32-Ho4-O28 | 160(3)   |
| Ho2-O2  | 2.246(6)  | O28-Ho1-O25 | 53.4(3)  | O17-Ho4-O28 | 87.9(3)  |
| Ho2-O10 | 2.255(6)  | O7-Ho2-O5   | 159.9(3) | O14-Ho4-O28 | 97.9(2)  |
| Ho2-O25 | 2.495(10) | O7-Ho2-O30  | 82.5(9)  | O23-Ho4-O28 | 75.3(2)  |
| Ho3-O13 | 2.228(6)  | O5-Ho2-O30  | 117.3(9) | O20-Ho4-O28 | 74.4(3)  |
| Ho3-O11 | 2.237(6)  | O7-Ho2-O2   | 91.0(2)  | O21-Ho5-O15 | 92.8(3)  |
| Ho3-O8  | 2.258(6)  | O5-Ho2-O2   | 91.3(2)  | O21-Ho5-O9  | 173.4(3) |
| Ho3-O16 | 2.286(6)  | O30-Ho2-O2  | 93.2(9)  | O15-Ho5-O9  | 91.7(3)  |
| Ho3-O31 | 2.350(7)  | O7-Ho2-O10  | 88.0(2)  | O21-Ho5-O3  | 86.5(3)  |
| Ho3-O27 | 2.495(6)  | O5-Ho2-O10  | 87.4(2)  | O15-Ho5-O3  | 177.4(2) |
| Ho3-O26 | 2.503(6)  | O30-Ho2-O10 | 93.3(9)  | O9-Ho5-O3   | 88.8(2)  |
| Ho4-O32 | 2.145(16) | O2-Ho2-O10  | 173.2(2) | O21-Ho5-O33 | 85.6(3)  |
| Ho4-O17 | 2.192(7)  | O7-Ho2-O25  | 86.7(2)  | O15-Ho5-O33 | 87.6(3)  |

|             |           |             |           |             |            |
|-------------|-----------|-------------|-----------|-------------|------------|
| Ho4-O14     | 2.223(6)  | O5-Ho2-O25  | 74.5(3)   | O9-Ho5-O33  | 99.4(2)    |
| Ho4-O23     | 2.226(7)  | O30-Ho2-O25 | 164.9(9)  | O3-Ho5-O33  | 94.9(2)    |
| Ho4-O20     | 2.227(6)  | O2-Ho2-O25  | 76.5(3)   | O21-Ho5-O26 | 94.9(2)    |
| Ho4-O28     | 2.530(10) | O10-Ho2-O25 | 96.8(3)   | O15-Ho5-O26 | 77.7(2)    |
| Ho5-O21     | 2.170(6)  | O13-Ho3-O11 | 170.2(2)  | O9-Ho5-O26  | 81.3(2)    |
| Ho5-O15     | 2.230(7)  | O13-Ho3-O8  | 91.4(2)   | O3-Ho5-O26  | 99.8(2)    |
| Ho5-O9      | 2.235(6)  | O11-Ho3-O8  | 85.8(2)   | O33-Ho5-O26 | 165.3(2)   |
| Ho5-O3      | 2.242(6)  | O13-Ho3-O16 | 89.7(2)   | O24-Ho6-O6  | 87.7(3)    |
| Ho5-O33     | 2.325(7)  | O11-Ho3-O16 | 90.4(3)   | O24-Ho6-O12 | 178.4(3)   |
| Ho5-O26     | 2.355(6)  | O8-Ho3-O16  | 163.3(2)  | O6-Ho6-O12  | 91.2(3)    |
| Ho6-O24     | 2.212(6)  | O13-Ho3-O31 | 89.7(2)   | O24-Ho6-O18 | 86.9(2)    |
| Ho6-O6      | 2.226(7)  | O11-Ho3-O31 | 80.8(2)   | O6-Ho6-O18  | 174.2(3)   |
| Ho6-O12     | 2.231(6)  | O8-Ho3-O31  | 85.2(2)   | O12-Ho6-O18 | 94.1(3)    |
| Ho6-O18     | 2.275(6)  | O16-Ho3-O31 | 78.1(2)   | O24-Ho6-O34 | 95.4(2)    |
| Ho6-O34     | 2.278(6)  | O13-Ho3-O27 | 114.6(2)  | O6-Ho6-O34  | 90.9(3)    |
| Ho6-O27     | 2.328(6)  | O11-Ho3-O27 | 74.9(2)   | O12-Ho6-O34 | 86.0(2)    |
| O1-Ho1-O22  | 176.0(3)  | O8-Ho3-O27  | 116.4(2)  | O18-Ho6-O34 | 91.9(2)    |
| O1-Ho1-O4   | 91.0(3)   | O16-Ho3-O27 | 77.9(2)   | O24-Ho6-O27 | 99.9(2)    |
| O22-Ho1-O4  | 86.5(3)   | O31-Ho3-O27 | 145.5(2)  | O6-Ho6-O27  | 96.1(2)    |
| O1-Ho1-O19  | 89.0(3)   | O13-Ho3-O26 | 76.8(2)   | O12-Ho6-O27 | 78.9(2)    |
| O22-Ho1-O19 | 92.6(3)   | O11-Ho3-O26 | 111.6(2)  | O18-Ho6-O27 | 82.6(2)    |
| O4-Ho1-O19  | 167.1(2)  | O8-Ho3-O26  | 77.8(2)   | O34-Ho6-O27 | 163.4(2)   |
| O1-Ho1-O29  | 94.3(3)   | O16-Ho3-O26 | 118.6(2)  | Ho1-O25-Ho2 | 134.48(41) |
| O22-Ho1-O29 | 82.4(3)   | O31-Ho3-O26 | 157.9(2)  | Ho1-O28-Ho4 | 134.10(37) |
| O4-Ho1-O29  | 85.8(3)   | O27-Ho3-O26 | 56.48(19) | Ho3-O26-Ho5 | 136.30(27) |
| O19-Ho1-O29 | 81.3(3)   | O32-Ho4-O17 | 98(2)     | Ho3-O27-Ho6 | 135.23(27) |

**Table S7** Selected bond lengths (Å) and angles (°) for **Yb<sub>6</sub>** at 193 K

|         |           |             |          |             |          |
|---------|-----------|-------------|----------|-------------|----------|
| Yb1-O1  | 2.183(7)  | O1-Yb1-O28  | 112.1(2) | O17-Yb4-O14 | 87.7(3)  |
| Yb1-O22 | 2.188(7)  | O22-Yb1-O28 | 74.2(3)  | O20-Yb4-O14 | 88.4(3)  |
| Yb1-O4  | 2.213(7)  | O4-Yb1-O28  | 114.8(2) | O17-Yb4-O23 | 88.9(3)  |
| Yb1-O19 | 2.242(7)  | O19-Yb1-O28 | 78.2(2)  | O20-Yb4-O23 | 94.4(3)  |
| Yb1-O29 | 2.292(8)  | O29-Yb1-O28 | 146.0(3) | O14-Yb4-O23 | 175.7(3) |
| Yb1-O28 | 2.456(7)  | O1-Yb1-O25  | 74.2(2)  | O17-Yb4-O32 | 93.6(6)  |
| Yb1-O25 | 2.531(8)  | O22-Yb1-O25 | 110.3(3) | O20-Yb4-O32 | 97.5(6)  |
| Yb2-O7  | 2.149(7)  | O4-Yb1-O25  | 75.1(3)  | O14-Yb4-O32 | 99.2(7)  |
| Yb2-O2  | 2.172(6)  | O19-Yb1-O25 | 118.1(3) | O23-Yb4-O32 | 83.6(7)  |
| Yb2-O5  | 2.172(7)  | O29-Yb1-O25 | 156.9(3) | O17-Yb4-O28 | 91.5(3)  |
| Yb2-O10 | 2.188(7)  | O28-Yb1-O25 | 56.5(2)  | O20-Yb4-O28 | 78.7(3)  |
| Yb2-O30 | 2.233(11) | O7-Yb2-O2   | 92.1(3)  | O14-Yb4-O28 | 98.8(2)  |
| Yb2-O25 | 2.373(8)  | O7-Yb2-O5   | 166.1(3) | O23-Yb4-O28 | 78.6(3)  |
| Yb3-O13 | 2.178(6)  | O2-Yb2-O5   | 91.9(3)  | O32-Yb4-O28 | 161.5(7) |
| Yb3-O11 | 2.193(7)  | O7-Yb2-O10  | 88.0(3)  | O21-Yb5-O15 | 91.4(3)  |

|             |           |             |          |             |            |
|-------------|-----------|-------------|----------|-------------|------------|
| Yb3-O8      | 2.225(7)  | O2-Yb2-O10  | 177.4(3) | O21-Yb5-O3  | 87.6(3)    |
| Yb3-O16     | 2.239(7)  | O5-Yb2-O10  | 87.4(3)  | O15-Yb5-O3  | 178.0(3)   |
| Yb3-O31     | 2.302(7)  | O7-Yb2-O30  | 86.0(7)  | O21-Yb5-O9  | 173.6(3)   |
| Yb3-O26     | 2.443(6)  | O2-Yb2-O30  | 90.6(7)  | O15-Yb5-O9  | 92.5(3)    |
| Yb3-O27     | 2.477(6)  | O5-Yb2-O30  | 107.4(7) | O3-Yb5-O9   | 88.3(3)    |
| Yb4-O17     | 2.132(7)  | O10-Yb2-O30 | 92.0(7)  | O21-Yb5-O33 | 86.9(3)    |
| Yb4-O20     | 2.163(7)  | O7-Yb2-O25  | 90.2(3)  | O15-Yb5-O33 | 87.0(3)    |
| Yb4-O14     | 2.181(7)  | O2-Yb2-O25  | 78.5(3)  | O3-Yb5-O33  | 94.7(3)    |
| Yb4-O23     | 2.187(7)  | O5-Yb2-O25  | 77.6(3)  | O9-Yb5-O33  | 98.4(3)    |
| Yb4-O32     | 2.215(10) | O10-Yb2-O25 | 98.9(3)  | O21-Yb5-O26 | 94.9(3)    |
| Yb4-O28     | 2.369(8)  | O30-Yb2-O25 | 168.3(8) | O15-Yb5-O26 | 78.1(2)    |
| Yb5-O21     | 2.145(7)  | O13-Yb3-O11 | 171.1(3) | O3-Yb5-O26  | 100.2(2)   |
| Yb5-O15     | 2.171(6)  | O13-Yb3-O8  | 91.7(3)  | O9-Yb5-O26  | 81.0(3)    |
| Yb5-O3      | 2.189(6)  | O11-Yb3-O8  | 84.8(3)  | O33-Yb5-O26 | 165.0(2)   |
| Yb5-O9      | 2.200(7)  | O13-Yb3-O16 | 88.4(3)  | O6-Yb6-O24  | 89.5(3)    |
| Yb5-O33     | 2.257(7)  | O11-Yb3-O16 | 92.7(3)  | O6-Yb6-O18  | 174.6(3)   |
| Yb5-O26     | 2.298(6)  | O8-Yb3-O16  | 164.0(2) | O24-Yb6-O18 | 86.2(2)    |
| Yb6-O6      | 2.173(7)  | O13-Yb3-O31 | 90.1(2)  | O6-Yb6-O12  | 89.6(3)    |
| Yb6-O24     | 2.200(7)  | O11-Yb3-O31 | 81.4(3)  | O24-Yb6-O12 | 178.5(3)   |
| Yb6-O18     | 2.211(7)  | O8-Yb3-O31  | 85.1(3)  | O18-Yb6-O12 | 94.6(3)    |
| Yb6-O12     | 2.212(7)  | O16-Yb3-O31 | 79.0(3)  | O6-Yb6-O34  | 91.4(3)    |
| Yb6-O34     | 2.219(7)  | O13-Yb3-O26 | 76.1(2)  | O24-Yb6-O34 | 94.5(3)    |
| Yb6-O27     | 2.283(6)  | O11-Yb3-O26 | 111.1(2) | O18-Yb6-O34 | 92.2(3)    |
| O1-Yb1-O22  | 173.6(2)  | O8-Yb3-O26  | 78.0(2)  | O12-Yb6-O34 | 86.7(3)    |
| O1-Yb1-O4   | 90.3(3)   | O16-Yb3-O26 | 117.5(2) | O6-Yb6-O27  | 95.9(3)    |
| O22-Yb1-O4  | 86.6(3)   | O31-Yb3-O26 | 157.6(2) | O24-Yb6-O27 | 100.0(2)   |
| O1-Yb1-O19  | 89.2(3)   | O13-Yb3-O27 | 113.7(2) | O18-Yb6-O27 | 81.7(2)    |
| O22-Yb1-O19 | 92.5(3)   | O11-Yb3-O27 | 75.1(2)  | O12-Yb6-O27 | 78.9(2)    |
| O4-Yb1-O19  | 166.0(3)  | O8-Yb3-O27  | 117.4(2) | O34-Yb6-O27 | 163.8(3)   |
| O1-Yb1-O29  | 93.6(3)   | O16-Yb3-O27 | 76.9(2)  | Yb1-O25-Yb2 | 136.31(35) |
| O22-Yb1-O29 | 80.6(3)   | O31-Yb3-O27 | 145.2(2) | Yb1-O28-Yb4 | 135.45(36) |
| O4-Yb1-O29  | 85.6(3)   | O26-Yb3-O27 | 57.1(2)  | Yb3-O26-Yb5 | 137.10(27) |
| O19-Yb1-O29 | 80.5(3)   | O17-Yb4-O20 | 168.8(3) | Yb3-O27-Yb6 | 135.98(27) |

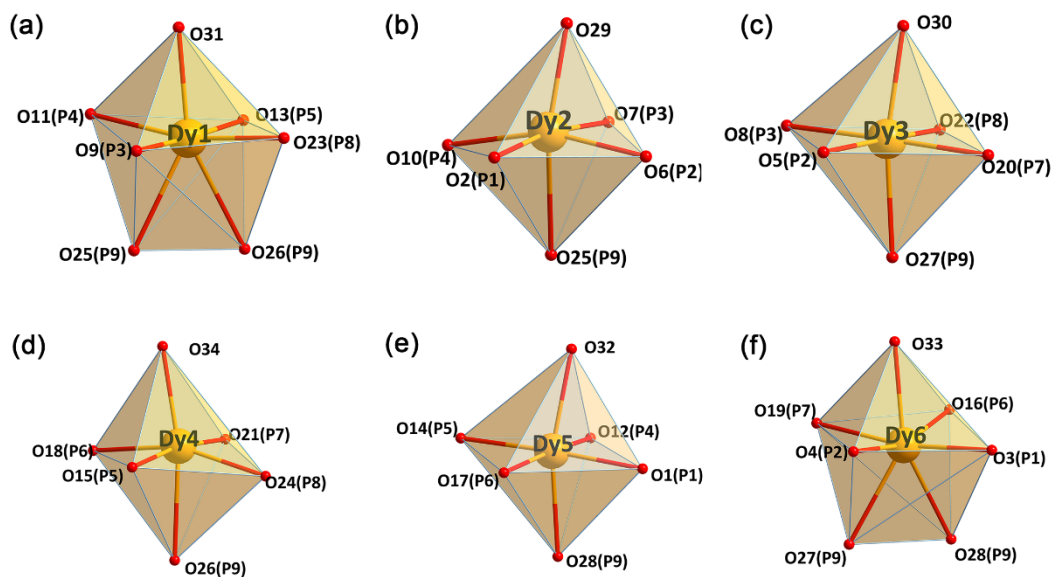

Fig. S5 Different coordination modes of Dy<sup>III</sup> in Dy<sub>6</sub>.

Table S8 Coordination geometry for Dy<sub>6</sub> at 193 K.

| Geometry                                             | Dy1    | Dy6    |        |        |     |     |
|------------------------------------------------------|--------|--------|--------|--------|-----|-----|
| Heptagon ( $D_{7h}$ )                                | 30.996 | 31.471 |        |        |     |     |
| Hexagonal pyramid ( $C_{6v}$ )                       | 21.074 | 22.158 |        |        |     |     |
| Pentagonal bipyramid ( $D_{5h}$ )                    | 5.690  | 5.541  |        |        |     |     |
| Capped octahedron ( $C_{3v}$ )                       | 2.930  | 2.485  |        |        |     |     |
| Capped trigonal prism ( $C_{2v}$ )                   | 1.389  | 0.998  |        |        |     |     |
| Johnson pentagonal bipyramid J13 ( $D_{5h}$ )        | 8.532  | 8.469  |        |        |     |     |
| Johnson elongated triangular pyramid J7 ( $C_{3v}$ ) | 18.234 | 19.741 |        |        |     |     |
|                                                      |        |        | Dy2    | Dy3    | Dy4 | Dy5 |
| Hexagon ( $D_{6h}$ )                                 | 29.148 | 30.224 | 28.796 | 29.872 |     |     |
| Pentagonal pyramid ( $C_{5v}$ )                      | 22.822 | 23.480 | 22.557 | 24.771 |     |     |
| Octahedron ( $O_h$ )                                 | 1.346  | 0.894  | 1.587  | 0.973  |     |     |
| Trigonal prism ( $D_{3h}$ )                          | 12.539 | 13.038 | 11.440 | 13.014 |     |     |
| Johnson pentagonal pyramid J2 ( $C_{5v}$ )           | 25.769 | 27.253 | 25.463 | 27.906 |     |     |

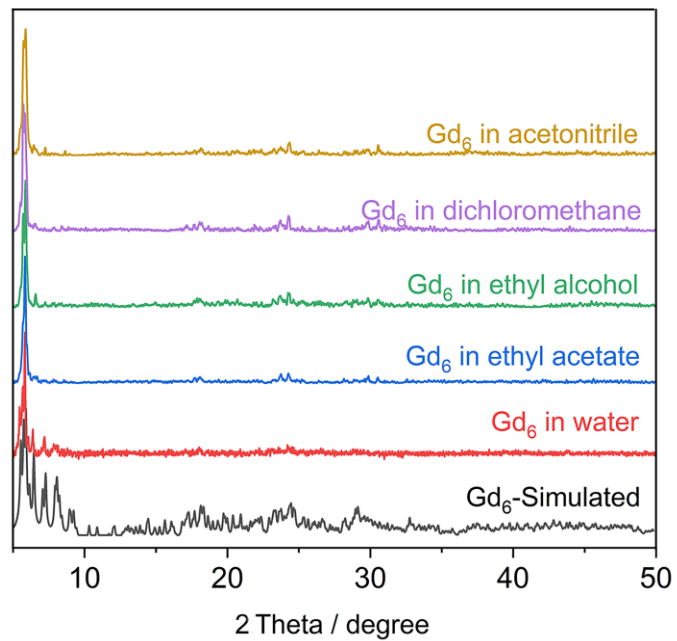

**Fig. S6** PXRD spectra of **Gd<sub>6</sub>** immersed in different solvents for 1 day.

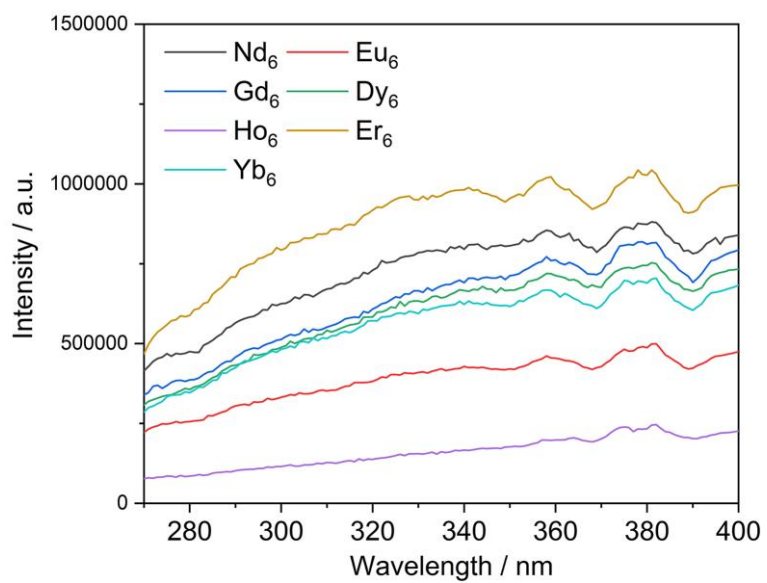

**Fig. S7** Excitation spectra of **Ln<sub>6</sub>** in the solid state ( $\lambda_{em}=427$  nm).

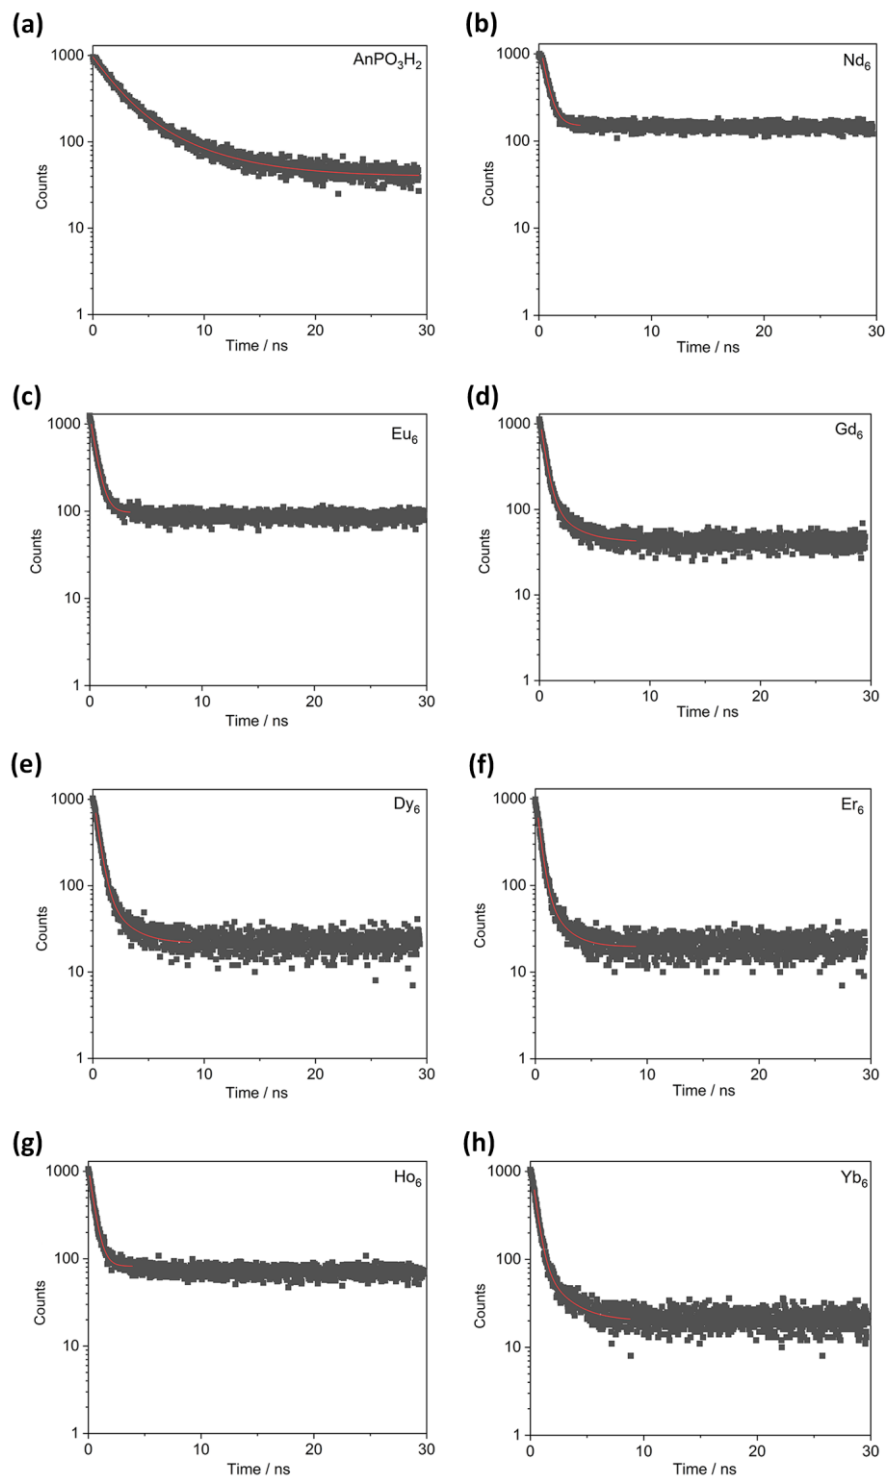

**Fig. S8** Fluorescence decay curve (black dots) and fitting line (red line) for  $\text{AnPO}_3\text{H}_2$  emitting at 444 nm and  $\text{Nd}_6\text{-Yb}_6$  emitting at 427 nm ( $\lambda_{\text{ex}} = 375$  nm).

**Table S9** The emission peak and life time of  $\text{AnPO}_3\text{H}_2$  and compounds  $\text{Nd}_6$  -  $\text{Yb}_6$ .

|                              | $\text{Nd}_6$   | $\text{Eu}_6$   | $\text{Gd}_6$   | $\text{Dy}_6$   | $\text{Ho}_6$   | $\text{Er}_6$   | $\text{Yb}_6$   | $\text{AnPO}_3\text{H}_2$ |
|------------------------------|-----------------|-----------------|-----------------|-----------------|-----------------|-----------------|-----------------|---------------------------|
| $\lambda/\text{nm}$          | 427             | 427             | 427             | 427             | 427             | 427             | 427             | 444                       |
| $\tau_1/\text{ns}$           | 0.46<br>(83.2%) | 0.44<br>(85.9%) | 0.47<br>(66.1%) | 0.44<br>(69.6%) | 0.46<br>(89.8%) | 0.37<br>(66.5%) | 0.41<br>(68.0%) | 1.96<br>(49.2%)           |
| $\tau_2/\text{ns}$           | 1.33<br>(16.8%) | 1.25<br>(14.1%) | 1.98<br>(33.9%) | 1.75<br>(30.4%) | 1.31<br>(10.2%) | 1.46<br>(33.5%) | 1.91<br>(32.0%) | 5.44<br>(50.8%)           |
| $\tau_{\text{av}}/\text{ns}$ | 0.61            | 0.55            | 0.98            | 0.84            | 0.55            | 0.74            | 0.89            | 3.73                      |
| $\chi^2$                     | 0.984           | 0.915           | 1.068           | 1.033           | 1.079           | 1.087           | 0.926           | 0.916                     |

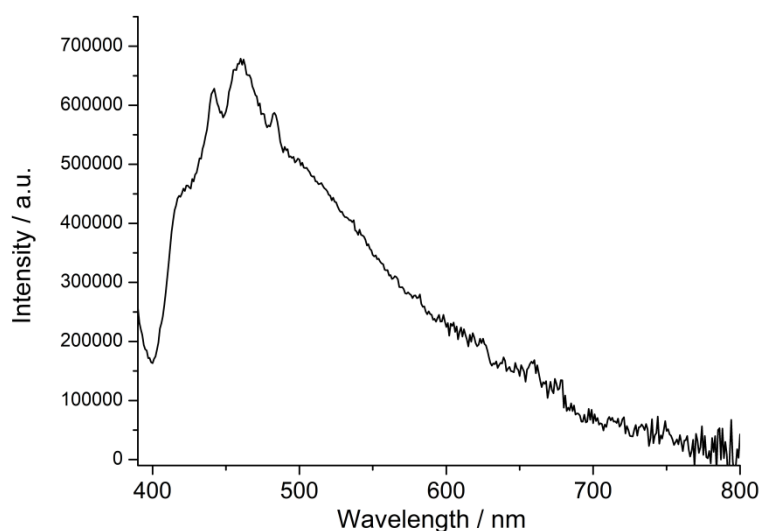**Fig. S9** Phosphorescent spectrum excited at 375 nm for  $\text{Gd}_6$  at 77 K.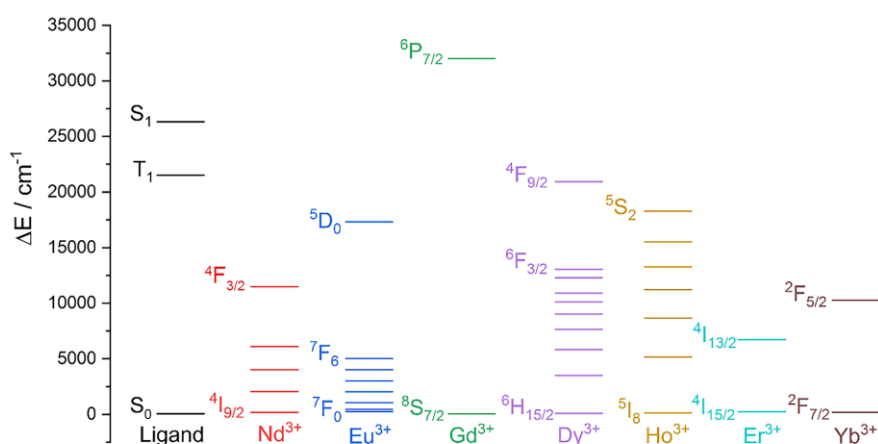**Fig. S10** Simplified energy diagram showing the lanthanide excited states and the estimated triplet state of  $\text{AnPO}_3\text{H}_2$  in  $\text{Gd}_6$ .



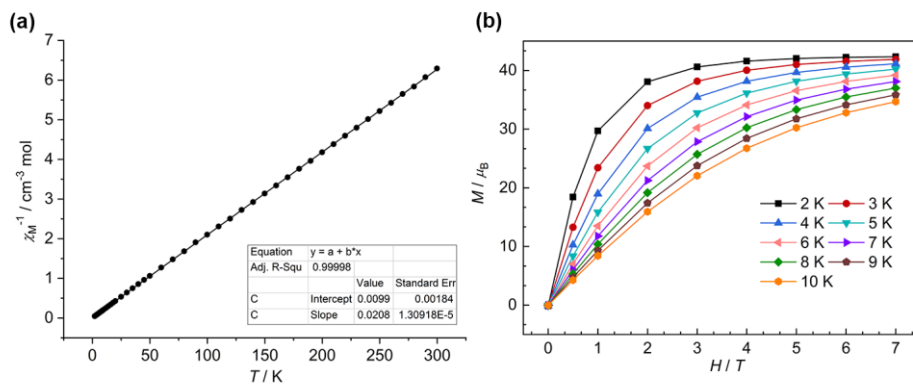

**Fig. S11** (a) Temperature dependence of the  $\chi_M^{-1}$  product at 1 kOe for  $\text{Gd}_6$ . (b) Molar magnetization ( $M$ ) against magnetic field ( $H$ ) for  $\text{Gd}_6$  from 0-7 T at 2-10 K.

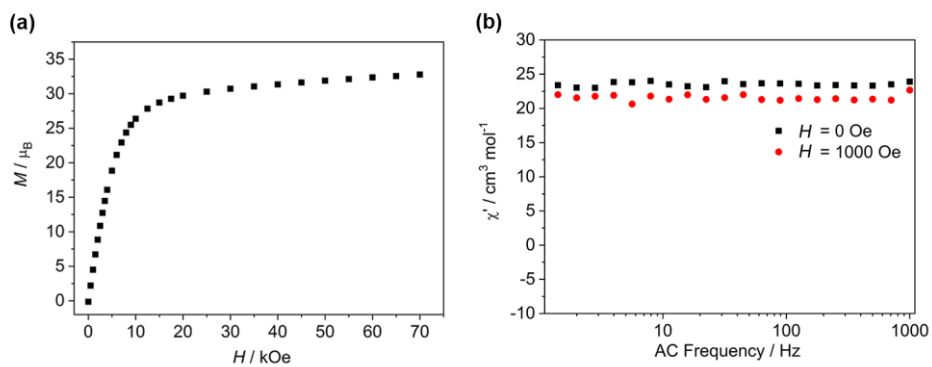

**Fig. S12** (a) Molar magnetization ( $M$ ) against magnetic field ( $H$ ) for  $\text{Dy}_6$  from 0-70 kOe at 2 K. (b) Frequency dependence of the in-phase susceptibilities of  $\text{Dy}_6$ .

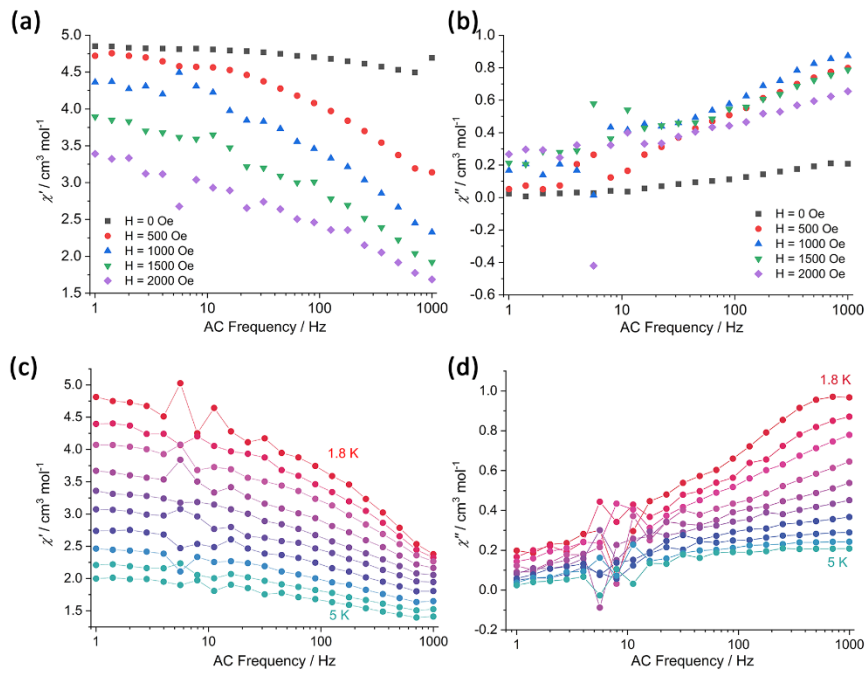

**Fig. S13** Frequency dependence of the in-phase (a) and out-of-phase (b) ac-susceptibilities of **DyY<sub>5</sub>** under different dc field at 1.8 K. Frequency dependence of the in-phase (c) and out-of-phase (d) ac-susceptibilities of **DyY<sub>5</sub>** under 1kOe dc field at 1.8-5 K.

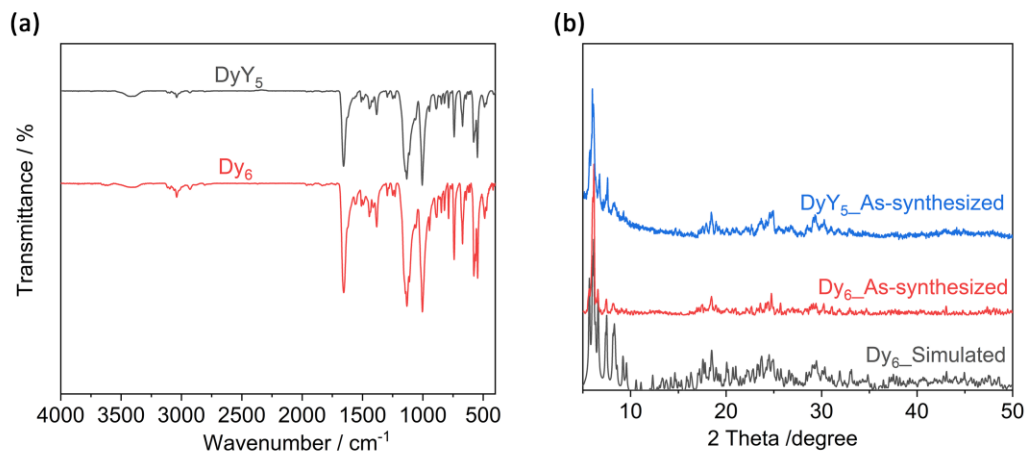

**Fig. S14** (a) IR spectra of **DyY<sub>5</sub>** and **Dy<sub>6</sub>**. (b) PXRD patterns of **Dy<sub>6</sub>** and **DyY<sub>5</sub>**.

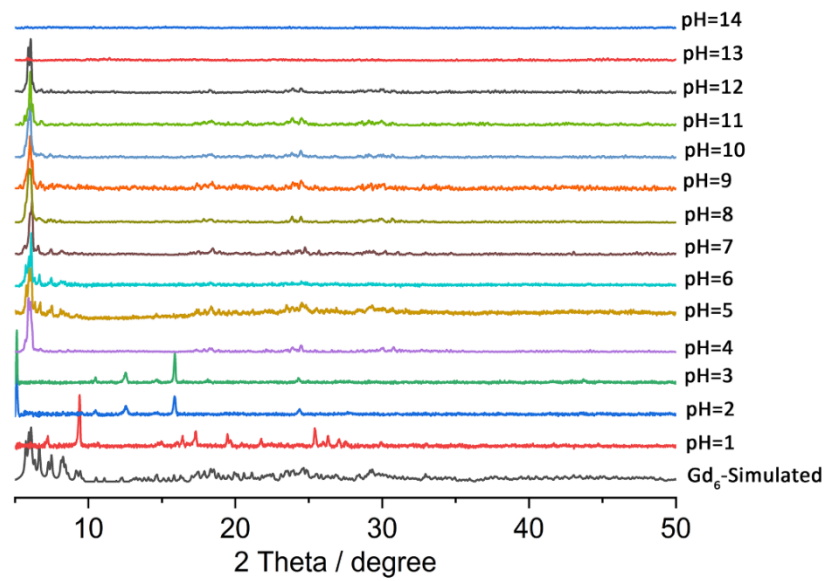

**Fig. S15** XRD patterns of **Gd<sub>6</sub>** immersed in aqueous solutions with pH values of 1-14 for 1 day.

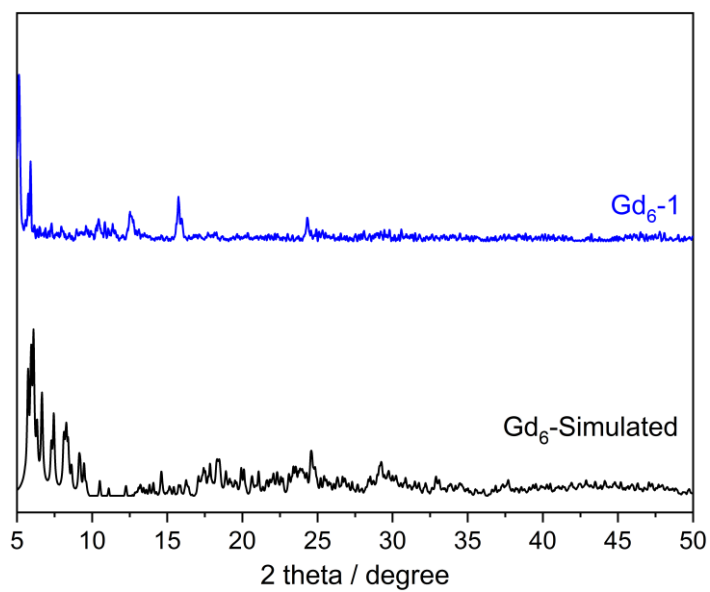

**Fig. S16** XRD patterns of **Gd<sub>6</sub>** as well as **Gd<sub>6</sub>-1**.

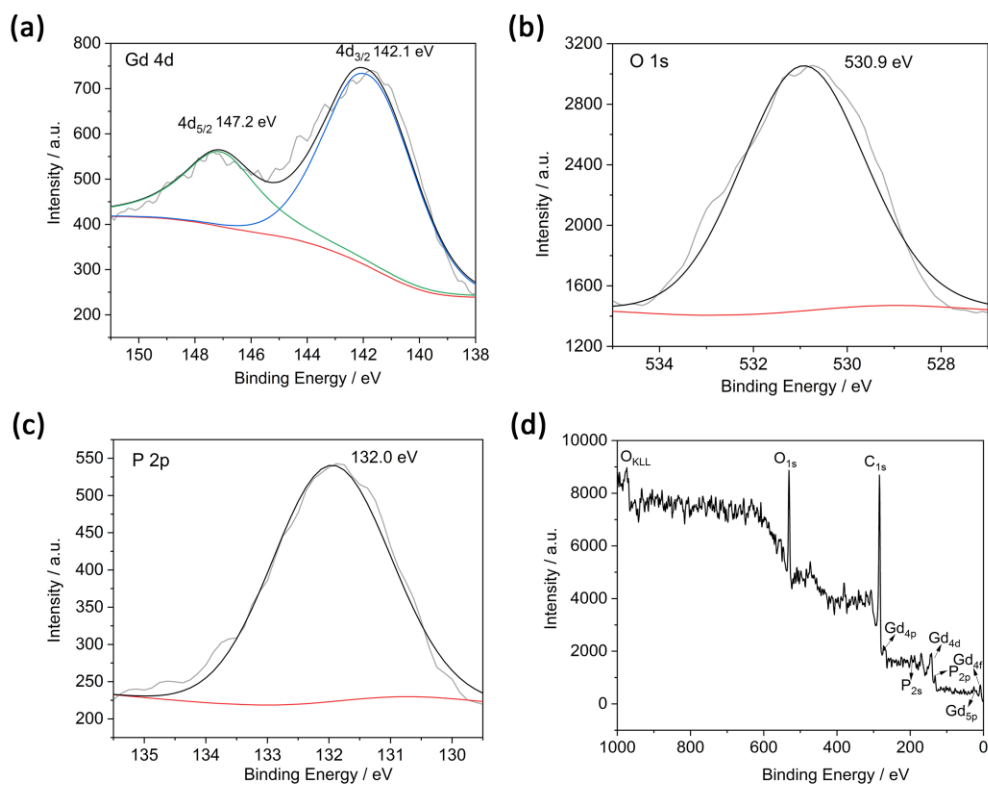

Fig. S17 XPS spectra of  $Gd_6$ .

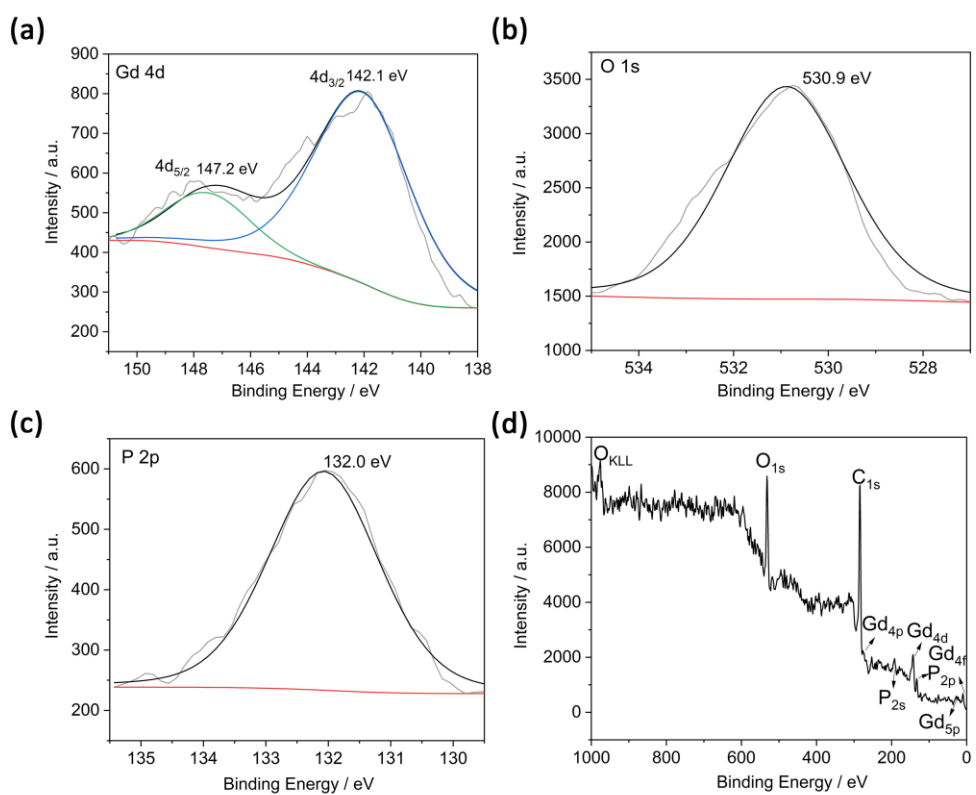

Fig. S18 XPS spectra of  $Gd_6-1$ .

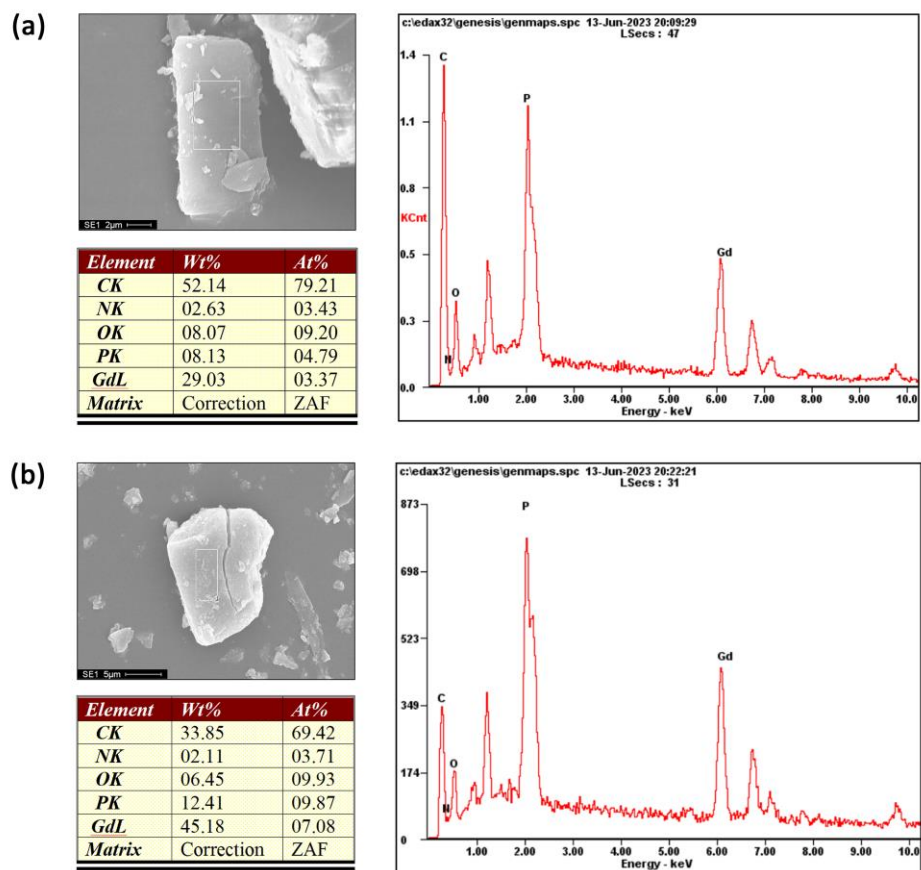

Fig. S19 EDS spectra of (a)  $Gd_6$  and (b)  $Gd_6-1$ .

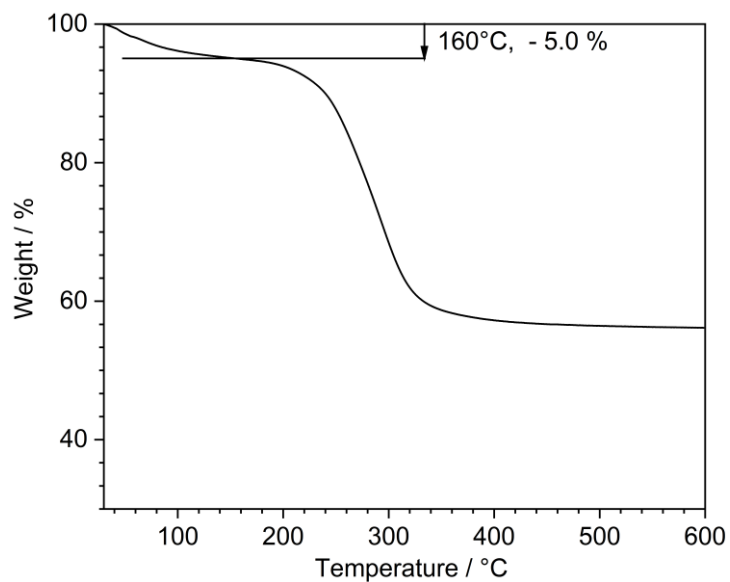

Fig. S20 TG curves of  $Gd_6-1$  at 30-600°C with a heating rate of 5°C/min under  $N_2$  flow.

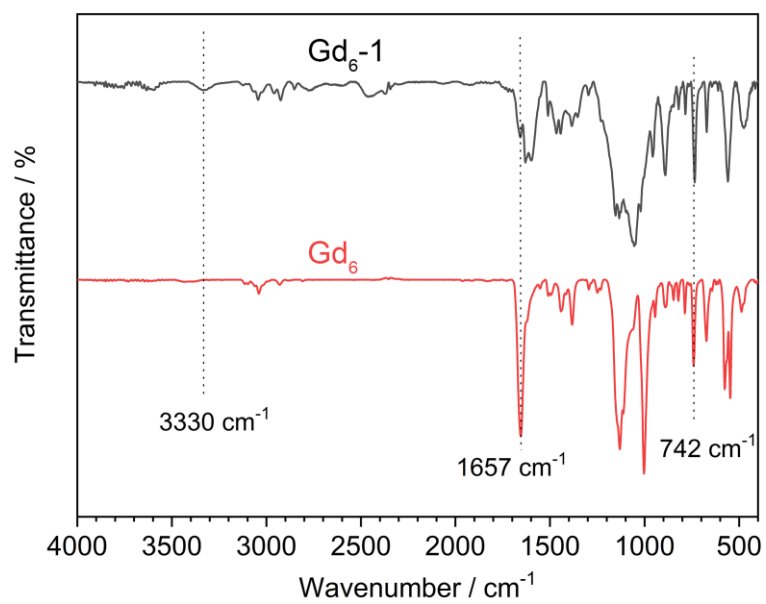

**Fig. S21** IR spectra of  $\text{Gd}_6$  and  $\text{Gd}_6-1$ .
